The *Brassica napus* Wall-Associated Kinase-Like (WAKL) gene *Rlm9* provides race-specific blackleg resistance

Nicholas J. Larkan<sup>1</sup>, Lisong Ma<sup>2</sup>, Parham Haddadi<sup>2</sup>, Miles Buchwaldt<sup>2</sup>, Isobel A. P. Parkin<sup>2</sup>, Mohammad Djavaheer<sup>2</sup> and M. Hossein Borhan<sup>2\*</sup>

<sup>1</sup>Armatus Genetics Inc., Saskatoon, SK, Canada

<sup>2</sup>Agriculture & Agri-Food Canada, Saskatoon, SK, Canada

Key words: *Leptosphaeria maculans*, blackleg, *Brassica napus*, *Rlm9*, *AvrLm5-9*, disease resistance, wall-associated kinase-like

## Abstract

In plants, race-specific defense against microbial pathogens is facilitated by resistance (*R*) genes which correspond to specific pathogen avirulence (*Avr*) genes. This study reports the cloning of a blackleg *R* gene from *Brassica napus* (canola); *Rlm9*, which encodes a wall-associated kinase-like (WAKL) protein, a newly-discovered class of race-specific plant RLK resistance genes. *Rlm9* provides race-specific resistance against isolates of *Leptosphaeria maculans* carrying the corresponding avirulence gene *AvrLm5-9*, representing only the second WAKL-type *R* gene described to date. The *Rlm9* protein is predicted to be cell membrane-bound yet appears to have no direct interaction with *AvrLm5-9*. *Rlm9* forms part of a distinct evolutionary family of RLK proteins in *B. napus*, and while little is yet known about WAKL function, the *Brassica-Leptosphaeria* pathosystem may prove to be a model system by which the mechanism of fungal avirulence protein recognition by WAKL-type *R* genes can be determined.

## Introduction

Plants detect invading microbial pathogens through the perception of conserved pathogen-associated molecular patterns (PAMPs). Perception of PAMPs by the extracellular pattern recognition receptors (PRR), consisting of various receptor-like kinases (RLKs) and receptor-like proteins (RLPs), initiates host PAMP triggered immunity (PTI), the first layer of defense against pathogens. PRRs also respond to damage-associated molecular patterns (DAMPs); host peptides and oligosaccharide fragments such as pectin-derived oligogalacturonides (OGs) released during pathogen breaching of the plant cell wall (Yang *et al.*, 2012; Zipfel *et al.*, 2014; Boutrot & Zipfel, 2017). Pathogens have evolved to overcome PTI by secreting small proteins called effectors, which often target components of the plant's defense pathways. In turn plants are armed with an array of highly diverse resistance (*R*) genes which encode both cytoplasmic and extracellular receptors to perceive pathogen effectors and trigger a rapid and robust immune response called effector-triggered immunity (ETI) (Bent & Mackey, 2008; Jones & Dangl, 2006; Stotz *et al.*, 2014). Generally, PTI provides broad-spectrum resistance as it is triggered by conserved signals, such as bacterial flagellin, fungal chitin or host-derived OGs, while ETI is specific to the races of single species of pathogen which

produces the matching effector(s). However, PTI and ETI share common signaling pathways (Katagiri & Tsuda, 2010) and the distinction between the two is blurred. There are examples of PRR proteins that confer race specificity and *R* genes that are now being considered as PRRs (Thomma et al., 2011; Rodriguez-Moreno et al., 2018).

Plant RLK proteins are a large and diverse gene family which underwent massive expansion after the divergence of the plant and animal lineages (Shiu & Bleecker, 2001). RLKs are defined by a common set of domains; a signal peptide, a single transmembrane domain and a cytoplasmic kinase domain. The extracellular regions of the proteins vary, adapted to the recognition of diverse signals. Based on their conserved intracellular kinase domains plant RLKs form a monophyletic group distinct from other eukaryotic kinases (Shiu & Bleecker, 2001). Membrane bound RLPs, which feature extracellular leucine-rich repeat (eLRR) domains involved in protein recognition but lack the intracellular kinase domain of RLKs, constitute a class of R proteins that confer resistance upon perception of apoplastic pathogen effectors (Stotz *et al.*, 2014; Jamieson *et al.*, 2018). We previously reported the cloning of two RLP type resistance genes, *LepR3* and *Rlm2*, residing in the A genome of the allotetraploid (AACC) *Brassica napus* (canola, rapeseed) (Larkan et al., 2013; Larkan et al., 2015), conferring resistance against races of the fungal pathogen *Leptosphaeria maculans* (Lm) with the matching effectors AvrLm1 and AvrLm2, respectively (Ghanbarnia *et al.*, 2015; Gout *et al.*, 2006). Both *LepR3* and *Rlm2* pair with the RLK SOBIR1 (Ma & Borhan, 2015; Larkan *et al.*, 2015) as RLPs, lacking any intracellular kinase, require a partner to transmit a signal across the plasma membrane and to activate cytoplasmic signal-transduction cascades (Liebrand *et al.*, 2014).

The *Brassica R* genes *Rlm3*, *Rlm4*, *Rlm7* and *Rlm9* confer race-specific resistance against blackleg disease caused by Lm. They form a tight genetic cluster on chromosome A07 and may possibly be allelic variants of the same *R* locus (Larkan *et al.*, 2016). The corresponding avirulence (*Avr*) genes *AvrLm3*, *AvrLm4-7* and *AvrLm5-9* have been cloned from Lm and all encode small cysteine-rich secreted proteins (Parlange *et al.*, 2009; Plissonneau *et al.*, 2016; Ghanbarnia *et al.*, 2018). Recognition of both AvrLm3 and AvrLm5-9 by Rlm3 and Rlm9, respectively, is masked in the presence of AvrLm4-7. However AvrLm4-7 neither interferes with the expression of, nor directly interacts with, AvrLm3 or AvrLm5-9, nor do AvrLm3 and AvrLm5-9 interact (Ghanbarnia *et al.*, 2018). To investigate this complex system of pathogen recognition we have pursued the cloning of *Brassica R* genes from the *Rlm3/4/7/9* gene cluster. Here we report cloning of *Rlm9* from the *B. napus* cultivar ‘Darmor’ and show that it encodes a wall-associated kinase-like (WAKL) protein, a newly-emerging class of race-specific plant RLK resistance genes (Keller & Krattinger, 2018).

## Results

### ***Rlm9* encodes a Wall-associated Kinase-like Protein**

Through molecular mapping, the physical interval of the *Rlm9* locus had previously been defined as approximately 4.3 Mb of chromosome A07 (Larkan *et al.*, 2016) of the *Brassica napus* reference genome ‘Darmor-bzh’ (Chalhoub *et al.*, 2014), an *Rlm9* variety. *Rlm9* is genetically clustered with the other blackleg *R* genes *Rlm3*, *Rlm4* and *Rlm7*, all of which were shown to co-segregate with the microsatellite marker sR7018 positioned at approximately 16 Mb on chromosome A07 (Larkan *et al.*, 2016). Using this information along with previously generated genomic information for the *Rlm3* locus (Mayerhofer *et al.*, 2002) we searched the physical interval of the *Rlm3-4-7-9* cluster on the *B. napus* Darmor-bzh (*Rlm9*) genome for genes with similarity to *R* genes and expression in response to pathogen infection. BnaA07g20220D, a wall associated kinase-like protein (WAKL) encoding gene was identified as the best candidate for *Rlm9*. The WAKL is predicted to encode a 794 aa protein with the typical features of the wall-associated kinase-like family of *Arabidopsis thaliana* (Verica & He, 2002), showing the highest homology to *A. thaliana* WAKL10 (At1g79680, 69% amino acid identity). The gene consists of three exons encoding a transmembrane receptor protein, which contains predicted extracellular domains for pectin and calcium binding (wall-associated receptor kinase galacturonan-binding (GUB\_WAK) and epithelial growth factor (EGF)-like  $Ca^{2+}$  domains, respectively), a C-terminal WAK domain and an intracellular serine/threonine protein kinase domain with a guanylyl cyclase motif (Figure 1).

BnaA07g20220D and its promoter was isolated from ‘Darmor’ and transferred to the susceptible *B. napus* cultivar ‘Westar N-o-1’. After transgenic events were analysed in the T<sub>0</sub> generation by ddPCR, four independent transgenic lines, carrying between 1 and 9 copies of the transgene, were selected for phenotypic analysis. Self seed of each line (T<sub>1</sub>) was inoculated with the transgenic Lm isolate 2367:AvrLm5-9. Race specific resistance response was expressed in all Westar:BnaA07g20220D transgenic lines, confirming that the WAKL gene is indeed *Rlm9* (Figure 2). Further ddPCR analysis of the T<sub>1</sub> plants derived from transgenic line NLA68 (one heterozygous transgene insertion at T<sub>0</sub>) allowed for selection of a T<sub>1</sub> plant carrying a single homozygous insertion which was self-fertilized to produce homozygous T<sub>2</sub> seed (hereafter referred to as Westar:*Rlm9*). Further testing of Westar:*Rlm9* with additional transgenic isolates carrying virulence genes matching other A07 blackleg *R* genes (2367:AvrLm1, 2367:AvrLm3, 2367:AvrLm4-7, 2367:AvrLm7) produced only susceptible interactions (data not shown) as previously demonstrated (Ghanbarnia *et al.*, 2018). This reconfirmed both the identity of BnaA07g20220D as *Rlm9* and the specificity of the *Rlm9* – AvrLm5-9 interaction.

An identical *Rlm9* allele was identified from the genome sequence of *B. napus* var. ‘Tapidor’ (Bayer *et al.*, 2017), which also harbours *Rlm9* (Larkan *et al.*, 2016) (Supplementary Table 1). A susceptible allele (*rlm9*; Supplementary Table 1) was obtained from the genome sequence (v2.0) of *B. napus* var. ‘ZS11’ (He *et al.*, 2015). The *B. rapa* var. ‘Chiifu’ homologue (Bra003598 – unknown *Rlm9* phenotype) (Wang *et al.*, 2011) was also include for comparison studies. Comparison of the resistant *Rlm9* and susceptible *rlm9* proteins (95.72% identity overall) revealed that most of the variation appeared concentrated in the predicted pectin-binding (GUB\_WAK) domains (15

substitutions within the 119 aa domain; 87.39% identity), while the C-terminal WAK and EGF-like domains were well conserved (94.69% and 100% identity, respectively).

RNAseq time course analysis revealed a significant upregulation of *Rlm9* during *L. maculans* infection (isolate 00-100; A2-3-5-6-(8)-9-10-L1-L2-L4) with approximately 5-fold increase early in the infection (3 days post-infection, FDR <0.03) and a near 8-fold increase in transcript abundance detected at 6 dpi (FDR<0.001) in the *Rlm9* variety 'Darmor' when compared to a susceptible (*rlm9*) variety 'Topas DH16516' or the mock (water) inoculated control. No significant difference was detected in the expression of the fungal *AvrLm5-9* between the inoculated susceptible and resistant lines over the same time course (Figure 3). Expression of the *B. napus* *SOBIR1* and *BAK1* genes, previously shown to interact with the *B. napus* RLP-type *R* genes, *Rlm2* and *LepR3* (Larkan *et al.*, 2013; Larkan *et al.*, 2015), were up-regulated (up to 10.5 fold) during infection of the *Rlm2* plants. However, in the infected *Rlm9* plants, both the *SOBIR1* and *BAK1* homologues (6 copies each in *B. napus*) showed little upregulation (0-2 fold), suggesting they may not be involved in the same manner during the WAKL *R*-gene response (Supplementary Figure 1).

### **Confirmation of *Rlm9* in *B. napus* varieties**

A selection of 22 *B. napus* cultivars, including many either previously identified as *Rlm9* lines, or suspected to harbour *Rlm9* based on previous differential pathology (data not shown), and the introgression line Topas-*Rlm9*, were tested for the presence of the *Rlm9* allele. The presence of *Rlm9* was first confirmed via infection with the transgenic *L. maculans* isolate 2367:AvrLm5-9, which induced a hypersensitive response in all 13 *Rlm9* lines (Supplementary Table 1, Supplementary Figure 2). All lines were susceptible to the non-transgenic 2367 isolate. The allele was successfully amplified from each of the 13 *Rlm9* lines (Supplementary Table 1), while only weak non-specific amplicons were produced from non-*Rlm9* lines, including cultivars containing other A07 blackleg *R* genes (*Rlm1*, *Rlm3*, *Rlm4* & *Rlm7*).

### **No direct physical interaction detected between *Rlm9* and either AvrLm5-9 or AvrLm4-7**

Recently, we reported the cloning of *L. maculans* effector *AvrLm5-9* (Ghanbarnia *et al.*, 2018). As previously reported recognition of AvrLm5-9 and AvrLm3 by their cognate R proteins, *Rlm9* and *Rlm3* is masked in the presence of AvrLm4-7 and this masking effect is neither due to direct interaction between these effector proteins nor due to the suppression of their transcription (Plissonneau *et al.*, 2016; Ghanbarnia *et al.*, 2018). To examine whether AvrLm5-9 directly interacts with *Rlm9*, we cloned the extracellular region of *Rlm9* in the prey vector pGADT7 and *AvrLm5-9* lacking the signal peptide sequences in the bait vector pGBKT7 for yeast two-hybrid assay. The assay was performed by co-transforming the bait and prey constructs to yeast strain Y2HGold. The

combination of the *L. maculans* effector AvrLm1 (bait) and its *B. napus* host-interacting protein BnMPK9 (Ma *et al.*, 2018) (prey) were used as a positive control. No interaction could be detected between AvrLm5-9 and the extracellular region of Rlm9 (Figure 4). To assess whether AvrLm4-7, which masks the recognition of AvrLm5-9 by Rlm9, directly interacts with either the extracellular region or the kinase domain of Rlm9 to suppress *Rlm9*-mediated resistance, we co-transferred the bait vector pGBKT7: $\Delta$ AvrLm4-7 and either prey vector pGADT7:*Rlm9*-EX or pGADT7:*Rlm9*-KD to yeast. As shown in Figure 4 there was no interaction between AvrLm4-7 and Rlm9-EX or Rlm9-KD, indicating that the masking of *Rlm9*-mediated resistance by AvrLm4-7 is not due to the direct interaction of AvrLm4-7 and Rlm9.

### Evolution of the WAKL gene family in *B. napus*

To compare the evolution of the WAKL gene family between *A. thaliana* and *B. napus*, predicted WAKL-encoding genes, those encoding proteins with homology to the external domain of Rlm9, were extracted from the Darmorbzh reference *B. napus* genome. After annotation 18 additional genes encoding potential functional RLKs (predicted proteins containing SP, TM and PK domains) were identified. All 18 predicted proteins also contained GUB\_WAK and C-terminal WAK domains, while 15 of the 18 contained EGF-Like domains. WAKLs were distinguished from WAKs based on homology (>25% identity to extracellular domain of Rlm9), presence of C-terminal WAK domain and lack of twin EGF domains found in WAKs (Supplementary Table 2). The predicted *B. napus* WAKLs were found to be largely clustered on two chromosomes in each of the A (A08 & A09) and C (C06 & C08) genomes (Figure 5). Genomic alignment between syntenic *A. thaliana* blocks containing 18 of the previously-characterised 22 AtWAKLs (Verica & He, 2002) which also encode intact RLKs, and the two genomes of *B. napus* revealed that almost all of the predicted WAKLs in *B. napus* are syntenic to the WAKL genes clustered on *A. thaliana* chromosome 1 (Figure 5). Comparison of WAKL GUB\_WAK domains to AtWAK1 showed that none of the four amino acid residues previously identified as contributing to homogalacturonan binding within the AtWAK1 GUB\_WAK domain (Decreux *et al.*, 2006) are conserved in either the resistant or susceptible alleles of Rlm9, nor in AtWAKL10, and show generally poor conservation in both WAKL and WAK predicted proteins from *B. napus*. (Supplementary Figure 3). Phylogenetic analysis for the predicted GUB\_WAK domains also suggests that the WAKL proteins are a distinct evolutionary group from WAKs (Supplementary Figure 3.)

### Discussion

The number of characterised race-specific resistance (*R*) genes has significantly expanded since the cloning of the first *R* gene in 1992, with the majority of described *R* genes encoding intracellular Nod-like receptors (NLRs) (Zhang *et al.*, 2017; Kourelis & Van Der Hoorn, 2018). However, a number of cell surface receptor proteins, collectively

referred to as plant pattern recognition receptors (PRRs) which are involved in the recognition of extracellular plant pathogens, both through PAMPs and specific effectors, have also been identified (Boutrot & Zipfel, 2017). *Rlm9* and the recently-cloned wheat *Stb6* are the only examples of a race-specific WAKL-type *R* genes to be reported to date. *Stb6* confers resistance to races of the apoplastic fungal pathogen *Zymoseptoria tritici* which produce the matching effector AvrStb6, though resistance is semi-dominant and conferred without a typical hypersensitive response (HR) (Zhong *et al.*, 2017; Saintenac *et al.*, 2018). In contrast *Rlm9* induces a clear, dominant HR at the site of infection, responding to the presence of the *L. maculans* avirulence protein AvrLm5-9 (Ghanbarnia *et al.*, 2018). The emergence of WAKL proteins as new players in race-specific resistance brings with it many fundamental questions. Using Y2H we did not detect a direct interaction between AvrLm5-9 and Rlm9, which was also reported to be the case between *Stb6* and AvrStb6 (Saintenac *et al.*, 2018 ). Although Y2H is not an optimal test to detect direct interaction of membrane proteins it is possible that Rlm9 recognition of AvrLm5-9 is indirect and mediated by a host target molecule. One such molecule could be a DAMP such as pectin monomers. However, the mechanism by which these predicted pectin-binding proteins function as mediators of race specificity has yet to be determined. The *Stb6* protein contains a predicted extracellular galacturonan-binding (GUB\_WAK) domain but does not contain either the C-terminal WAK or EGF-like  $\text{Ca}^{2+}$  domains found in Rlm9 and most other WAKL proteins (Saintenac *et al.*, 2018 ), which suggests that these domains could be dispensable for WAKL-mediated effector-triggered immune response. The concentration of variation in the GUB\_WAK domain between the resistant Rlm9 and susceptible rlm9 proteins in comparison to the other well-conserved extracellular domains (C-terminal WAK and EGF-like domains) also suggests that the GUB\_WAK domain may play a pivotal role in recognition of AvrLm5-9. While the GUB\_WAK domain of the *A. thaliana* wall-associated kinase 1 (WAK1) protein has been demonstrated to bind cell-wall pectins (Decreux & Messiaen, 2005), and WAKL proteins have been suggested to be associated with the cell wall (Verica & He, 2002; Hou *et al.*, 2005), the same pectin-binding activity has yet to be shown for the predicted GUB\_WAK domains of the WAKL proteins and much research needs to be undertaken before we can determine how these RLKs function. However, at present it should not be assumed that these proteins retain the ability to bind pectin. It may be that the original function of the gene was as a general DAMP receptor, as for AtWAK1 (Brutus *et al.*, 2010), and that these proteins later evolved into a more specialised role in the detection of proteinaceous ligands, in this case AvrLm5-9. As the conservation between WAKs and WAKLs appears in the EGF and kinase domains, rather than the putative pectin-binding regions, it may be more appropriate to consider WAKs and WAKLs as subsets of the EGF protein superfamily, rather than grouping both WAKs and WAKLs together as “wall-associated” proteins (Kohorn, 2016).

In *A. thaliana*, Rlm9 shares the highest protein homology with WAKL10 (At1g79680.1). AtWAKL10 is co-expressed with several pathogen response genes during biotic interactions. The protein kinase domain has been shown to be a twin-domain, also having guanylyl cyclase (GC) activity (Meier *et al.*, 2010). Rlm9 contains an identical GC motif (SFGVVLAELITGEK) within the PK domain. GCs convert guanosine 5'-triphosphate (GTP) into guanosine 3',5'-cyclic monophosphate (cGMP), an important signaling molecule during biotic interactions (Durner *et al.*, 1998; Gehring &

Turek, 2017). Plant cGMP-binding proteins include several actors in defense response pathways, including hydrogen peroxide production (Donaldson *et al.*, 2016). The potential GC activity of Rlm9 could be a key component of the hypersensitive response to *L. maculans* infection. Interestingly, the wheat Stb6 protein, which does not trigger a hypersensitive response (Saintenac *et al.*, 2018), appears to lack a GC centre in its kinase domain.

A search for WAKL homologues within the *B. napus* genome showed far fewer intact genes than was expected. *B. napus* is an amphidiploid hybrid of *B. rapa* (A genome) and *B. oleracea* (C genome), with each diploid genome having evolved from a hexaploid ancestor, with some gene loss occurring over time (Parkin *et al.*, 2005; Ziolkowski *et al.*, 2006). Therefore, for each single *A. thaliana* gene there is generally expected to be six homologues within *B. napus* (Grant *et al.*, 1998). Despite there being 22 WAKLs characterised in *A. thaliana* (Verica & He, 2002) we were only able to identify 29 intact WAKL genes predicted within the *B. napus* 'Darmor' sequence, only 18 of which are predicted to retain the SP, TM and PK domains required to function as an RLK (Supplementary Table 2). This suggests a disproportionate evolution of the genes since the Arabidopsis-Brassica split 20-24 Mya (Ziolkowski *et al.*, 2006). This may be due to functional redundancy, making many of the WAKL homologues within the amphidiploid genome (AACC) of *B. napus* dispensable. The relative abundance of WAKL genes in *A. thaliana* may also be due to a higher rate of gene expansion, as evidenced by the dense clusters of WAKL homologues and abundant tandem duplications found on *A. thaliana* chromosome 1 (12 genes total - Verica & He, 2002) which are only partially represented within each of the *B. napus* A and C genomes as homoeologues, while several AtWAKLs found on other chromosomes do not appear to be represented by intact genes in *B. napus*, despite syntenic links between the genomes (Figure 5).

As we recently reported, the recognition of AvrLm5-9 by Rlm9 is masked in the presence of AvrLm4-7 (Ghanbarnia *et al.*, 2018). Similarly, AvrLm3 recognition by Rlm3 is also masked in the presence of AvrLm4-7 (Plissonneau *et al.*, 2016). With the cloning of *Rlm9* and the characterisation of the gene as a WAKL we now have the basis for possibly identifying the other three blackleg *R* genes within the *Rlm3/4/7/9* cluster, co-located on chromosome A07 (Larkan *et al.*, 2016). Though *Rlm9* is the only A07 blackleg *R* gene carried by any of the published *B. napus* genomes (we identified the same *Rlm9* allele in both 'Darmor' (Chalhoub *et al.*, 2014) and 'Tapidor' (Bayer *et al.*, 2017), and showed a lack of specific *R* genes in 'ZS11' (He *et al.*, 2015) during this study) previous investigations into the blackleg resistance carried by 'DH12075', a doubled-haploid F<sub>1</sub>-derived line from 'Westar' (no *R* gene) and 'Cresor' (*Rlm3* - Larkan *et al.*, 2016) parents, identified three WAKL genes in the same location (I. Parkin, unpublished). We are currently investigating the allelic variation of the *Rlm9* locus in multiple *B. napus* accessions carrying *Rlm3*, *Rlm4* and *Rlm7* through parental-specific genome resequencing. If these genes prove to be variants or duplications of the same WAKL locus we can potentially gain further insight as to the evolution of WAKL-type *R* genes, and the *Brassica-Leptosphaeria* pathosystem may prove to be a model system by which the mechanism of fungal avirulence protein recognition by WAKLs can be determined.



## Methods

### Candidate Identification and Transformation

The BnaA07g20220D gene, including 1000 bp upstream and 500 bp downstream of the predicted CDS (4141 bp total), was PCR amplified (Q5 High-Fidelity 2x Master Mix, New England BioLabs) from ‘Darmor’ DNA, verified by Sanger sequencing, and transferred to the Gateway-compatible transformation vector pMDC123 (Curtis & Grossniklaus, 2003). The same primers (GW-DarWAKL F + R; Supplementary Table 3) were used to survey a selection of *B. napus* cultivars to confirm the presence of the target allele in multiple *Rlm9* sources. The genomic candidate construct was transformed via *Agrobacterium* into the susceptible *B. napus* cultivar ‘Westar N-o-1’ as previously described (Larkan *et al.*, 2013). Homozygous, single-insertion transgenic plants were selected in the T<sub>1</sub> generation using ddPCR (Larkan *et al.*, 2015). Final confirmation of phenotype was performed using the transgenic *L. maculans* isolate 2367:AvrLm5-9 (Ghanbarnia *et al.*, 2018).

### Transcript Analysis

Transcription time course profiles were generated by RNA-Seq (Illumina) for the *B. napus* cultivars Topas DH16516 (no *R* gene) and Darmor (*Rlm9*) during infection with the *L. maculans* isolate 00-100 (avirulence profile A2-3-5-6-(8)-9-(10)-L1-L2-L4 (Larkan *et al.*, 2016)) with sampling at 0, 3, 6 and 9 days after inoculation (dai). Additional data for the lines Topas-*Rlm2* and Topas-*Rlm3*, growth conditions, tissue sampling, RNA processing and read mapping protocols were as previously described (Becker *et al.*, 2019; Haddadi *et al.*, 2019). Confirmation of the predicted coding region and protein sequence was obtained by aligning merged RNA sequencing reads to the Darmor genome sequence using Bowtie2 (<http://bowtie-bio.sourceforge.net/bowtie2/manual.shtml>) and CLC Genomics Workbench 11 (<https://www.qiagenbioinformatics.com/products/clc-genomics-workbench/>).

### Yeast Two-hybrid Assay

For yeast two-hybrid assay, *AvrLm5-9* lacking signal peptide sequence was cloned into pGBKT7 bait vector with primer set  $\Delta$ spAvrLm5-9-NcoI/ $\Delta$ spAvrLm5-9-EcoRI and *AvrLm4-7* lacking signal peptide sequence was cloned into pGBKT7 bait vector with primer set  $\Delta$ spAvrLm4-7-NdeI/ $\Delta$ spAvrLm4-7-PstI. The intracellular kinase domain of *Rlm9* was cloned into pGADT7 prey vector with primer set *Rlm9*-KD-NdeI/*Rlm9*-KD-EcoRI and the extracellular region of *Rlm9* was cloned into pGADT7 with primer set *Rlm9*-EX-NdeI/*Rlm9*-EX-EcoRI (Clontech, Mountain View, USA). We



used the matchmaker GLA4 two-hybrid system and yeast strain Y2HGold (Clontech, Mountain View, USA). The yeast strain Y2HGold was co-transformed with bait and prey plasmid combinations using lithium-acetate and polyethylene glycol 3350 followed the manufacture manual. Transformants harboring both bait and prey plasmids were selected on plates containing minimal medium lacking Leu and Trp (SD-WL). Empty prey vector pGBKT7 or pGADT7 used as bait or prey served as controls. pGBKT7: $\Delta$ AvrLm1 and pGADT7:*BnMPK9* were used as positive control (Ma *et al.*, 2018). One colony per combination was picked from SD-WL plates to inoculate 1 mL SD-WL culture. After 36 h growth, cells were collected by centrifugation and resuspended in 25  $\mu$ L 0.9% NaCl from OD<sub>600</sub>=1 to OD<sub>600</sub>=0.00001 and spotted on SD-WL and SD-AHWL plates supplementing with 40  $\mu$ g/mL X- $\alpha$ -Gal (Clontech, Mountain View, USA) and 200 ng/ml Aureobasidin A (Clontech, Mountain View, USA). After 3 days incubation, the plates were checked for growth and photographed.

## Genomic and Phylogenetic Analyses

Predicted *B. napus* WAKL protein sequences, matching the extracellular domain of *Rlm9*, were retrieved from the Darmor-*bzh* reference annotation (Chalhoub *et al.*, 2014) using the blastP function (default values) in CLC Genomics Workbench v12. Protein sequences were annotated using InterPro (<http://www.ebi.ac.uk/interpro/>). Only those proteins containing predicted domains required for RLK function (SP, TM & PK) were included as potential functional WAKLs (Supplementary Table 2). Visualization of the homology between *Arabidopsis thaliana* TAIR10 (Wensel *et al.*, 2011) and *Brassica napus* Darmor-*bzh* (Chalhoub *et al.*, 2014) was produced using Circos (Krzyszowski *et al.*, 2009). Orthologous gene pairs identified from synteny analysis were used to determine regions of homology and intersections with the defined *B. napus* WAKL genes using BEDTools intersect (Quinlan & Hall, 2010). Multiple sequence alignments and dendrograms were produced using CLC Workbench v7.9.1 software.

## Acknowledgments

We would like to thank Elena Beynon, Colin Kindrachuk, Gordon Gropp, Catherine Guenther, Justin Skurdal and Erica Boyer for their technical assistance and Delwin Epp for generating the *B. napus* transgenic lines. Funding support for this project was provided by SaskCanola and Agriculture and Agri-Food Canada.

## Authors' contributions

NJL and MHB conceived the study. NJL designed the experiments and performed the research together with LM, PH and MD. MB and PH performed the bioinformatics analysis. NJL, MHB and IAPP wrote the manuscript with technical contributions from LM, PH and MB. All authors have read and approved the current version of the manuscript.

## Conflict of Interests:

Authors declare that they do not have any conflict of interest

## References

- Bayer, P.E., Hurgobin, B., Golicz, A.A., Chan, C.K., Yuan, Y., Lee, H., Renton, M., Meng, J., Li, R., Long, Y., Zou, J., Bancroft, I., Chalhoub, B., King, G.J., Batley, J., Edwards, D. (2017). Assembly and comparison of two closely related *Brassica napus* genomes. *Plant Biotechnology Journal*, 15(12):1602-1610.
- Becker, M.G., Haddadi, P., Wan, J., Adam, L., Walker, P., Larkan, N.J., Daayf, F., Borhan, M.H., Belmonte, M.F. (2019). Transcriptome analysis of *Rlm2*-mediated host immunity in the *Brassica napus*-*Leptosphaeria maculans* pathosystem. *Molecular Plant-Microbe Interactions*, 32(8):1001-1012.
- Bent, A.F., Mackey, D. (2008). Elicitors, effectors, and R genes: The new paradigm and a lifetime supply of questions. *Annual Review of Phytopathology*, 45:399-436.
- Boutrot, F., Zipfel, C. (2017). Function, Discovery, and Exploitation of Plant Pattern Recognition Receptors for Broad-Spectrum Disease Resistance. In: *Annual Review of Phytopathology*. vol. 55; 257-286.
- Brutus, A., Sicilia, F., Maccone, A., Cervone, F., De Lorenzo, G. (2010). A domain swap approach reveals a role of the plant wall-associated kinase 1 (WAK1) as a receptor of oligogalacturonides. *Proceedings of the National Academy of Sciences of the United States of America*, 107(20):9452-9457.
- Chalhoub, B., Denoeud, F., Liu, S., Parkin, I.A.P., Tang, H., Wang, X., Chiquet, J., Belcram, H., Tong, C., Samans, B. *et al.* (2014). Early allopolyploid evolution in the post-Neolithic *Brassica napus* oilseed genome. *Science*, 345(6199):950-953.
- Curtis, M.D., Grossniklaus, U. (2003). A gateway cloning vector set for high-throughput functional analysis of genes *in planta*. *Plant Physiology*, 133(2):462-469.
- Decreux, A., Messiaen, J. (2005). Wall-associated kinase WAK1 interacts with cell wall pectins in a calcium-induced conformation. *Plant Cell Physiol*, 46(2):268-278.
- Decreux, A., Thomas, A., Spies, B., Brasseur, R., Cutsem, P.V., Messiaen, J. (2006). *In vitro* characterization of the homogalacturonan-binding domain of the wall-associated kinase WAK1 using site-directed mutagenesis. *Phytochemistry*, 67(11):1068-1079.
- Donaldson, L., Meier, S., Gehring, C. (2016). The Arabidopsis cyclic nucleotide interactome. *Cell Commun Signal*, 14(1):10.
- Durner, J., Wendehenne, D., Klessig, D.F. (1998). Defense gene induction in tobacco by nitric oxide, cyclic GMP, and cyclic ADP-ribose. *Proceedings of the National Academy of Sciences of the United States of America*, 95(17):10328-10333.
- Gehring, C., Turek, I.S. (2017). Cyclic nucleotide monophosphates and their cyclases in plant signaling. *Frontiers in Plant Science*, 8:1704.
- Ghanbarnia, K., Fudal, I., Larkan, N.J., Links, M.G., Balesdent, M.-H., Profotova, B., Fernando, W.G.D., Rouxel, T., Borhan, M.H. (2015). Rapid identification of the *Leptosphaeria maculans* avirulence gene *AvrLm2* using an intraspecific comparative genomics approach. *Molecular Plant Pathology*, 16(7):699-709.

- Ghanbarnia, K., Ma, L., Larkan, N.J., Haddadi, P., Fernando, W.G.D., Borhan, M.H. (2018). *Leptosphaeria maculans* AvrLm9: A new player in the game of hide and seek with AvrLm4-7. *Molecular Plant Pathology*, 19(7):1754-1764.
- Gout, L., Fudal, I., Kuhn, M.-L., Blaise, F., Eckert, M., Cattolico, L., Balesdent, M.-H., Rouxel, T. (2006). Lost in the middle of nowhere: The *AvrLm1* avirulence gene of the Dothideomycete *Leptosphaeria maculans*. *Molecular Microbiology*, 60(1):67-80.
- Grant, M.R., McDowell, J.M., Sharpe, A.G., de Torres Zabala, M., Lydiate, D.J., Dangl, J.L. (1998). Independent deletions of a pathogen-resistance gene in *Brassica* and *Arabidopsis*. *Proceedings of the National Academy of Sciences*, 95(26):15843-15848.
- Haddadi, P., Larkan, N.J., Borhan, M.H. (2019). Dissecting *R* gene and host genetic background effect on the *Brassica napus* defense response to *Leptosphaeria maculans*. *Scientific Reports*, 9(1):6947.
- He, Z., Cheng, F., Li, Y., Wang, X., Parkin, I.A.P., Chalhoub, B., Liu, S., Bancroft, I. (2015). Construction of Brassica A and C genome-based ordered pan-transcriptomes for use in rapeseed genomic research. *Data in Brief*, 4:357-362.
- Hou, X., Tong, H., Selby, J., DeWitt, J., Peng, X., He, Z.H. (2005). Involvement of a cell wall-associated kinase, WAKL4, in Arabidopsis mineral responses. *Plant Physiology*, 139(4):1704-1716.
- Jamieson, P.A., Shan, L., He, P. (2018). Plant cell surface molecular cypher: Receptor-like proteins and their roles in immunity and development. *Plant Science*, 274:242-251.
- Jones, J.D.G., Dangl, J.L. (2006). The plant immune system. *Nature*, 444(7117):323-329.
- Katagiri, F., Tsuda, K. (2010). Understanding the plant immune system. *Molecular Plant-Microbe Interactions*, 23(12):1531-1536.
- Keller, B., Krattinger, S.G. (2018). A new player in race-specific resistance. *Nature Plants*, 4(4):197-198.
- Kohorn, B.D. (2016). Cell wall-associated kinases and pectin perception. *Journal of Experimental Botany*, 67(2):489-494.
- Kourelis, J., Van Der Hoorn, R.A.L. (2018). Defended to the nines: 25 years of resistance gene cloning identifies nine mechanisms for R protein function. *Plant Cell*, 30(2):285-299.
- Krzywinski, M., Schein, J., Birol, I., Connors, J., Gascoyne, R., Horsman, D., Jones, S.J., Marra, M.A. (2009). Circos: An information aesthetic for comparative genomics. *Genome Research*, 19(9):1639-1645.
- Larkan, N.J., Lydiate, D.J., Parkin, I.A.P., Nelson, M.N., Epp, D.J., Cowling, W.A., Rimmer, S.R., Borhan, M.H. (2013). The *Brassica napus* blackleg resistance gene *LepR3* encodes a receptor-like protein triggered by the *Leptosphaeria maculans* effector AVRML1. *New Phytologist*, 197(2):595-605.
- Larkan, N.J., Ma, L., Borhan, M.H. (2015). The *Brassica napus* receptor-like protein RLM2 is encoded by a second allele of the *LepR3/Rlm2* blackleg resistance locus. *Plant Biotechnology Journal*, 13(7):983-992.
- Larkan, N.J., Yu, F., Lydiate, D.J., Rimmer, S.R., Borhan, M.H. (2016). Single *R* gene introgression lines for accurate dissection of the *Brassica* - *Leptosphaeria* pathosystem. *Frontiers in Plant Science*, 7:1771.
- Liebrand, T.W.H., van den Burg, H.A., Joosten, M.H.A.J. (2014). Two for all: Receptor-associated kinases SOBIR1 and BAK1. *Trends in Plant Science*, 19(2):123-132.
- Ma, L., Borhan, M.H. (2015). The receptor-like kinase SOBIR1 interacts with *Brassica napus* LepR3 and is required for *Leptosphaeria maculans* AvrLm1-triggered immunity. *Frontiers in Plant Science*, 6:933.
- Ma, L., Djavaheri, M., Wang, H., Larkan, N.J., Haddadi, P., Beynon, E., Gropp, G., Borhan, M.H. (2018). *Leptosphaeria maculans* Effector Protein AvrLm1 Modulates Plant Immunity by Enhancing MAP Kinase 9 Phosphorylation. *iScience*, 3:177-191.
- Mayerhofer, R., Wilde, K., Mayerhofer, M., Lydiate, D., Bansal, V.K., Good, A.G., Parkin, I.A.P. (2005). Complexities of chromosome landing in a highly duplicated genome: Toward map-based cloning of a gene controlling blackleg resistance in *Brassica napus*. *Genetics*, 171(4):1977-1988.

- Meier, S., Ruzvidzo, O., Morse, M., Donaldson, L., Kwezi, L., Gehring, C. (2010). The Arabidopsis wall associated kinase-like 10 gene encodes a functional guanylyl cyclase and is co-expressed with pathogen defense related genes. *PLoS ONE*, 5(1).
- Parkin, I.A.P., Gulden, S.M., Sharpe, A.G., Lukens, L., Trick, M., Osborn, T.C., Lydiate, D.J. (2005). Segmental structure of the *Brassica napus* genome based on comparative analysis with *Arabidopsis thaliana*. *Genetics*, 171(2):765-781.
- Parlange, F., Daverdin, G., Fudal, I., Kuhn, M-L., Balesdent, M-H., Blaise, F., Grezes-Besset, B., Rouxel, T. (2009). *Leptosphaeria maculans* avirulence gene *AvrLm4-7* confers a dual recognition specificity by the *Rlm4* and *Rlm7* resistance genes of oilseed rape, and circumvents *Rlm4*-mediated recognition through a single amino acid change. *Molecular Microbiology*, 71(4):851-863.
- Plissonneau, C., Daverdin, G., Ollivier, B., Blaise, F., Degrave, A., Fudal, I., Rouxel, T., Balesdent, M-H. (2016). A game of hide and seek between avirulence genes *AvrLm4-7* and *AvrLm3* in *Leptosphaeria maculans*. *New Phytologist*, 209(4):1613-1624.
- Quinlan, A.R., Hall, I.M. (2010). BEDTools: A flexible suite of utilities for comparing genomic features. *Bioinformatics*, 26(6):841-842.
- Rodriguez-Moreno, L., Ebert, M.K., Bolton, M.D., Thomma, B.P.H.J. (2018). Tools of the crook- infection strategies of fungal plant pathogens. *Plant Journal*, 93(4):664-674.
- Saintenac, C., Lee, W.S., Cambon, F., Rudd, J.J., King, R.C., Marande, W., Powers, S.J., Bergès, H., Phillips, A.L., Uauy, C. *et al.* (2018). Wheat receptor-kinase-like protein *Stb6* controls gene-for-gene resistance to fungal pathogen *Zymoseptoria tritici*. *Nature Genetics*, 50(3):368-374.
- Shiu, S.H., Bleecker, A.B. (2001). Receptor-like kinases from *Arabidopsis* form a monophyletic gene family related to animal receptor kinases. *Proceedings of the National Academy of Sciences of the United States of America*, 98(19):10763-10768.
- Stotz, H.U., Mitrousis, G.K., de Wit, P.J.G.M., Fitt, B.D.L. (2014). Effector-triggered defence against apoplastic fungal pathogens. *Trends in Plant Science*, 19(8):491-500.
- Thomma, B.P.H.J., Nürnberger, T., Joosten, M.H.A.J. (2011) Of PAMPs and effectors: The blurred PTI-ETI dichotomy. *Plant Cell*, 23(1):4-15.
- Verica, J.A., He, Z.H. (2002). The cell wall-associated kinase (WAK) and WAK-like kinase gene family. *Plant Physiology*, 129(2):455-459.
- Wang, X., Wang, H., Wang, J., Sun, R., Wu, J., Liu, S., Bai, Y., Mun, J., Bancroft, I., Cheng, F. *et al* (2011). The genome of the mesopolyploid crop species *Brassica rapa*. *Nature Genetics*, 43(10):1035-1039.
- Wensel, A., Karthikeyan, A.S., Wilks, C., Lee, C.H., Swarbreck, D., Alexander, D.L., Li, D., Dreher, K., Ploetz, L., Garcia-Hernandez, M. *et al.* (2011). The Arabidopsis Information Resource (TAIR): Improved gene annotation and new tools. *Nucleic Acids Research*, 40(D1):D1202-D1210.
- Yang, X., Deng, F., Ramonell, K.M. (2012). Receptor-like kinases and receptor-like proteins: Keys to pathogen recognition and defense signaling in plant innate immunity. *Frontiers in Biology*, 7(2):155-166.
- Zhang, X., Dodds, P.N., Bernoux, M. (2017). What Do We Know about NOD-Like Receptors in Plant Immunity? In: *Annual Review of Phytopathology*. vol. 55: 205-229.
- Zhong, Z., Marcel, T.C., Hartmann, F.E., Ma, X., Plissonneau, C., Zala, M., Ducasse, A., Confais, J., Compain, J., Lapalu, N. *et al.* (2017). A small secreted protein in *Zymoseptoria tritici* is responsible for avirulence on wheat cultivars carrying the *Stb6* resistance gene. *New Phytologist*, 214(2):619-631.
- Ziolkowski, P.A., Kaczmarek, M., Babula, D., Sadowski, J. (2006). Genome evolution in Arabidopsis/Brassica: Conservation and divergence of ancient rearranged segments and their breakpoints. *Plant Journal*, 47(1):63-74.

Zipfel, C. (2014). Plant pattern-recognition receptors. *Trends in Immunology*, 35(7):345-351.

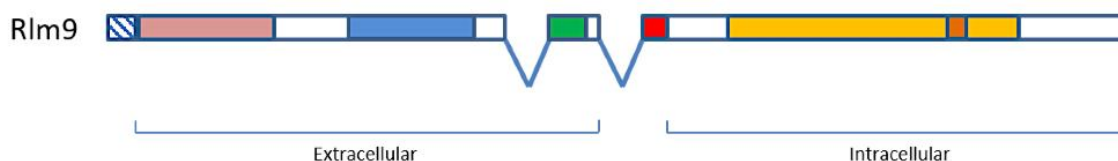

**Figure 1. Domain organisation of the Rlm9 protein.** The protein consists of 3 exons (introns denoted by 'V') and contains predicted signal peptide (hashed box), extracellular GUB\_WAK pectin binding (light red), C-terminal WAK (blue) and EGF-like Ca<sup>2+</sup> (green) domains, a transmembrane motif (red), and an intracellular serine/threonine protein kinase domain (light orange) with a guanylyl cyclase centre (dark orange).

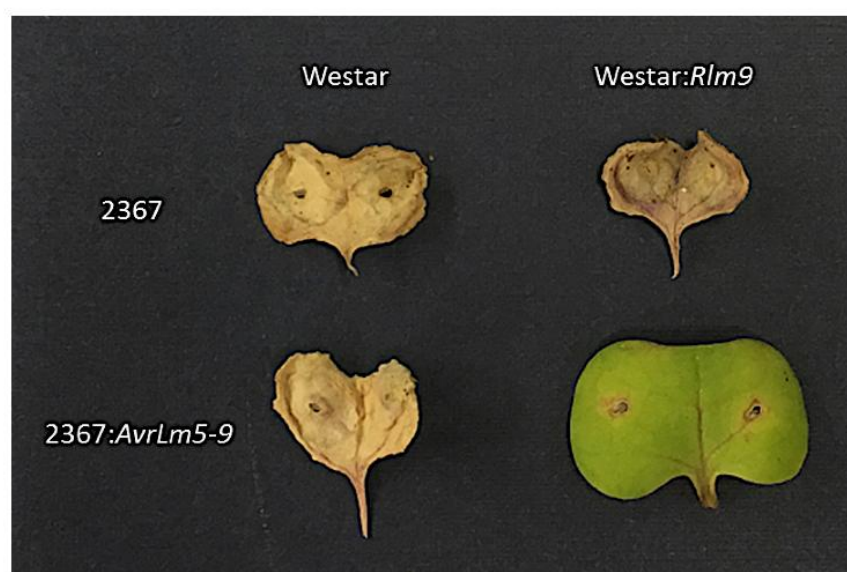

**Figure 2. Transgenic Complementation of Rlm9 Phenotype in *B. napus*.** Cotyledons of Westar (no *R* gene) and Westar:*Rlm9* transgenic line infected with *L. maculans*, 14 days-post infection. Isolate 2367 (phenotype a9 – virulent towards *Rlm9*) and the transgenic isolate 2367:*AvrLm5-9* (phenotype A9 – avirulent toward *Rlm9*).

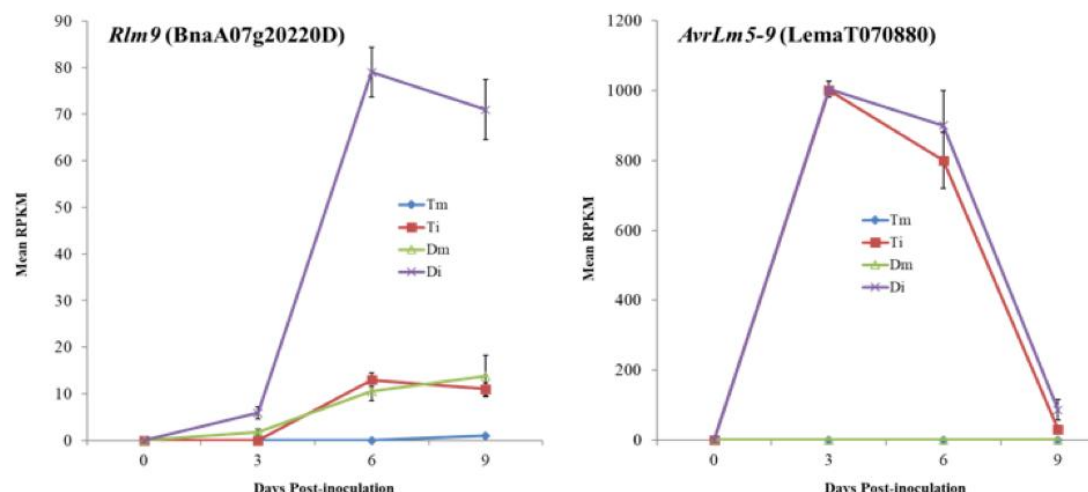

**Figure 3. Expression Profile of *Rlm9* and *AvrLm5-9* Alleles during infection by *L. maculans* isolate 00-100.** A) Mean RPKM (Reads Per Kilobase of transcript per Million mapped reads) for mock (m) and *L. maculans* infected (i) cotyledon lesions from *B.napus* lines Topas DH16516 (T – *rlm9*) and Darmor (D – *Rlm9*), showing significant upregulation of *Rlm9* detected between both Dm and Di, and Di and Ti, at all timepoints after zero. B) Mean RPKM for fungal *AvrLm5-9* during the same experiment, showing no significant difference between expression between Di and Ti.

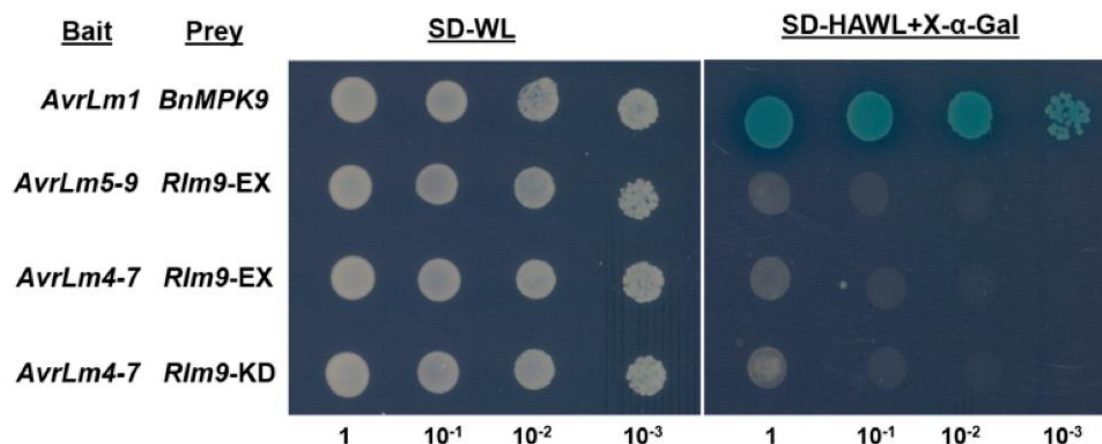

**Figure 4. Yeast Two-hybrid Assay.** Co-transformed (bait + prey) yeast plated at four dilutions (1 to 10<sup>-3</sup>). Interaction indicated by blue colouring. No interaction was detected for either *AvrLm5-9* or *AvrLm4-7* with the extracellular domain of *Rlm9* (*Rlm9-EX*), nor *AvrLm4-7* with the intracellular kinase domain (*Rlm9-KD*). *AvrLm1-BnMPK9* was included as positive control.



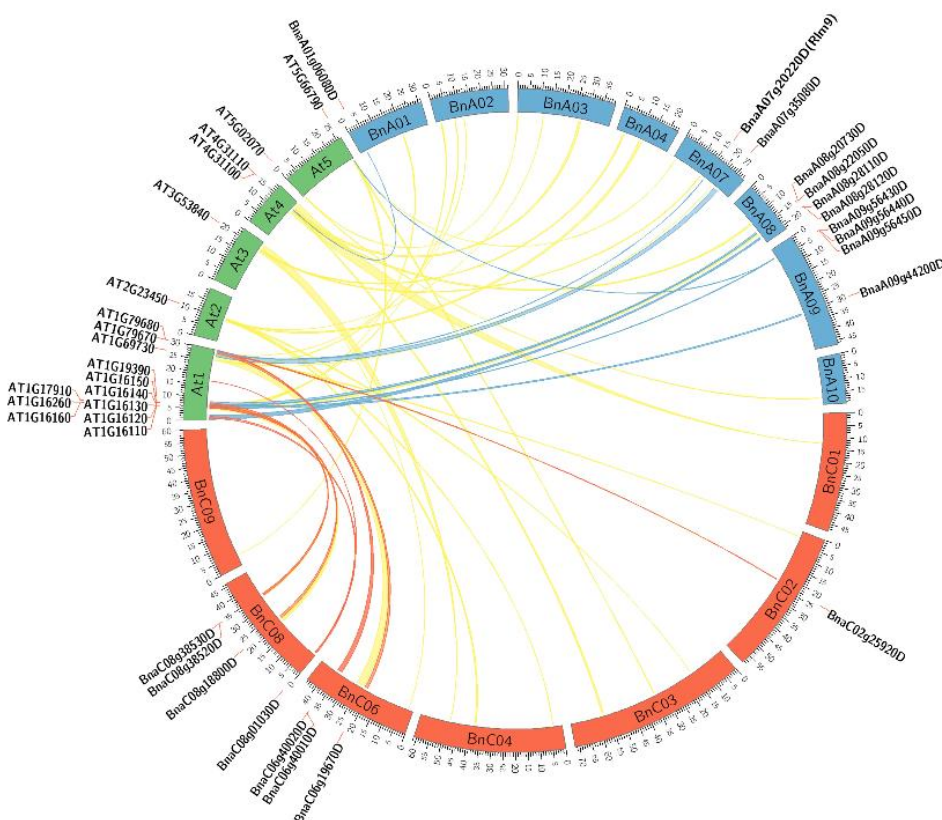

**Figure 5. Syntenic alignment of *A. thaliana* and *B. napus* WAKL genomic regions.** Genomic alignment between *A. thaliana* genomic blocks containing WAKL genes (“AT...” labels) and their syntenic matches in the *B. napus* A and C genomes. *B. napus* genes predicted to encode intact WAKL proteins labeled “Bna...”. Syntenic links between *A. thaliana* and *B. napus* WAKLs indicated by blue (A genome) and red (C genome) ribbons. Yellow ribbons indicate syntenic matches where no corresponding *B. napus* WAKL was found.

**Supplementary Figure 1. Expression of *B. napus* *SOBIR1* and *BAK1* Homologues.** Expression of genes during infection by *L. maculans* relative to Topas DH16516 (no *R* gene) in *B. napus* lines carrying the *R* genes *Rlm9* (WAKL), *Rlm3* (suspected WAKL) or *Rlm2* (RLP).

**Supplementary Figure 2. Transgenic Confirmation of *Rlm9* Phenotype in *B. napus* Varieties.** Cotyledons of *Rlm9* *B. napus* cultivars, 14 days after infection.



**Supplementary Figure 3. Multiple Sequence Alignment and Dendrogram for GUB\_WAK Domains.** A) Alignment and B) dendrogram of GUB\_WAK domains predicted for *B. napus* WAKs and WAKs with >20% amino acid identity to the extracellular domain of Rlm9. Black boxes (A) indicate residues previously identified as contributing to pectin binding in AtWAK1.

**Supplementary Table 1. *Rlm9* PCR and Pathological Interactions for *B. napus* Lines.** Isolate interactions classified as either virulent (avr) or avirulent (Avr) based in median infection score (in brackets, 0-9 scale – Larkan et al., 2013).

**Supplementary Table 2. *B. napus* WAKL and WAK protein matches**

**Supplementary Table 3. PCR Primers**
